# Supplementary material for: A Novel Regulatory Cascade Involving BluR, YcgZ, and Lon Controls the Expression of Escherichia coli OmpF Porin
Source: PubMed Central journal article supplement (PMC5491885; doi:10.3389/fmicb.2017.01148), 2017-06-30
Supplement: Data_Sheet_1.pdf [file Data_Sheet_1.pdf]

**SUPPLEMENTARY MATERIAL.**

**A novel regulatory cascade involving BluR, YcgZ and Lon controls the expression of Escherichia coli OmpF porin**

**Valérie Duval, Kimberly Foster, Jennifer Brewster, Stuart B. Levy**

Center for Adaptation Genetics and Drug Resistance, Tufts University School of Medicine,  
Department of Molecular Biology and Microbiology, Boston, MA, USA

Correspondence:

Stuart B. Levy: [stuart.levy@tufts.edu](mailto:stuart.levy@tufts.edu)

Valerie Duval: [valerie.duval@tufts.edu](mailto:valerie.duval@tufts.edu)

## 1. Supplementary Tables.

**Table S1.** Oligonucleotides used in this study.

| Name       | Nucleotide sequence 5'-3'                                                                     | Characteristics                                                                                                                                                                                            |
|------------|-----------------------------------------------------------------------------------------------|------------------------------------------------------------------------------------------------------------------------------------------------------------------------------------------------------------|
| ompF1      | GAATTCATTCTGGATGTCTGAAAGAAGATTTTG                                                             | Forward and reverse primers used for amplifying and cloning <i>ompF</i> promoter region into the pRS415 vector; EcoRI and BamHI restriction sites                                                          |
| ompF2      | GGATCCGTCTGCAGGCATCTTCCATTCAAAC                                                               |                                                                                                                                                                                                            |
| bluR-PA    | GTATTATTGGGTCGTGTACAGGCGACGGAGATT<br>TGTGACCGCAAGGAGGAATTGTGGTGTAGGCTG<br>GAGCTGCTTCGAAGTTCCT | Amplification of the Flp recombination target (FRT)-flanked chloramphenicol resistance gene ( <i>cat</i> ) from plasmid pKD3 containing sequences upstream and downstream of <i>bluR</i>                   |
| bluR-PB    | GTGGGTTTCAGATTATAACATTCTGTCTAAGGGG<br>CGGATAAAGGTGAAATTAATGGGAATTAGCCA<br>TGGTCCATATGAATATC   |                                                                                                                                                                                                            |
| bluR-PE    | GCACATTCTTTCACATGATTTTCAG                                                                     | Verification of the insertion of <i>cat</i> into <i>bluR</i> (combination primers <i>bluR-PE/cat-1</i> and <i>bluR-PF/cat-2</i> )                                                                          |
| bluR-PF    | GTGAGACTGCGTAGTGTGCACGATC                                                                     |                                                                                                                                                                                                            |
| ycgZ-PA    | GCTATTGTTACTTCACTTAACATTGATTAACATT<br>TTAACAGAGGCGTAGCATGGTGTAGGCTGGAG<br>CTGCTTCGAAGTTCCT    | Amplification of the Flp recombination target (FRT)-flanked chloramphenicol resistance gene ( <i>cat</i> ) from plasmid pKD3 containing sequences upstream and downstream of the <i>ycgZ-ymgABC</i> operon |
| ymgC-PB    | GCATCAGCATGGTGATACAGCTGATGTTTATTCT<br>AAAACCTTACTCAAGTTCTAATGGGAATTAGCC<br>ATGGTCCATATGAATATC |                                                                                                                                                                                                            |
| ycgZ-PE    | GTGAGGCGAGAGTAAGACGGTAACAG                                                                    | Verification of the insertion of <i>cat</i> into <i>ycgZ-ymgABC</i> (combination primers <i>ycgZ-PE/cat-1</i> and <i>ymgC-PF/cat-2</i> )                                                                   |
| ymgC-PF    | GCATCTACAGAGAGCATGGTAGAGAGC                                                                   |                                                                                                                                                                                                            |
| cat-1      | CTTCGAAGCAGCTCCAGCCTACAC                                                                      | Forward primer in <i>cat</i>                                                                                                                                                                               |
| cat-2      | ACGTGCCGATCAACGTCTCATTTTC                                                                     | Reverse primer in <i>cat</i>                                                                                                                                                                               |
| YcgZ-NcoI  | AATTAACCATGGGGCATCAAATTCAGTGACTT<br>TAGATTC                                                   | Forward primer used for amplifying <i>ycgZ</i>                                                                                                                                                             |
| YcgZ-EcoRI | AAAGAATTCACCATGCATCAAATTCAGTGACT<br>TTAGATTC                                                  | Forward primer used for amplifying <i>ycgZ</i>                                                                                                                                                             |
| YcgZ-XhoI  | AAACTCGAGTTATTCAAAAAGCAACCCAATTAG<br>TGC                                                      | Reverse primer used for amplifying <i>ycgZ</i>                                                                                                                                                             |
| YmgA-NcoI  | AATTAACCATGGGGAAGACATCTGATAATGAAC<br>GTATAAAA                                                 | Forward primer used for amplifying <i>ymgA</i>                                                                                                                                                             |
| YmgA-EcoRI | AAAGAATTCACCATGAAGACATCTGATAATGAA<br>CGTATAAAA                                                | Forward primer used for amplifying <i>ymgA</i>                                                                                                                                                             |
| YmgA-XhoI  | AAACTCGAGTTAATGTATTCTGTTTATTTCTTA<br>CCATTG                                                   | Reverse primer used for amplifying <i>ymgA</i>                                                                                                                                                             |

---

|             |                                                  |                                                                                                                                                            |
|-------------|--------------------------------------------------|------------------------------------------------------------------------------------------------------------------------------------------------------------|
| YmgB-NcoI   | AATTAACCATGGGGCTTGAAGATACTACAATC<br>ATAATGC      | Forward primer used for<br>amplifying <i>ymgB</i>                                                                                                          |
| YmgB-EcoRI  | AAAGAATTCACCATGCTTGAAGATACTACAATT<br>CATAATGC    | Forward primer used for<br>amplifying <i>ymgB</i>                                                                                                          |
| YmgB-XhoI   | AAACTCGAGTTACATATCATCAGCTGTGTATCGC<br>AAC        | Reverse primer used for<br>amplifying <i>ymgB</i>                                                                                                          |
| YmgC-NcoI   | AATTAACCATGGGGAATAATTCAATCCCAGAGA<br>GATTTATTTTC | Forward primer used for<br>amplifying <i>ymgC</i>                                                                                                          |
| YmgC-EcoRI  | AAAGAATTCACCATGAATAATTCAATCCCAGAG<br>AGATTTATT   | Forward primer used for<br>amplifying <i>ymgC</i>                                                                                                          |
| YmgC-PstI   | AAACTGCAGCTAAGAGAGCACGGATTCCCTGTC<br>ATT         | Reverse primer used for<br>amplifying <i>ymgC</i>                                                                                                          |
| BluRProm200 | CCCCCGAATTCCAGCACATTCTTTCACATGATT<br>TCAGTAAATC  | Amplification and cloning of<br><i>bluR</i> as well as its promoter and<br>terminator regions into the<br>pMPM vector; EcoRI and XhoI<br>restriction sites |
| BluRTer97   | CCCCCCTCGAGCCCGGTGAGCATTTTGCAACG<br>GACCAG       |                                                                                                                                                            |
| GapA-FWS2   | CGGTACCGTTGAAGTGAAAGA                            | Quantitative PCR <i>gapA</i>                                                                                                                               |
| GapA-RVS2   | ACTTCGTCCCATTTCAGGTTAG                           |                                                                                                                                                            |
| OmpF-FWS2   | CCGGTTATGGTCAGTGGGAATA                           | Quantitative PCR <i>ompF</i>                                                                                                                               |
| OmpF-RVS2   | GCGTATTTAAGACCCGCGAATG                           |                                                                                                                                                            |
| YcgZ-FWS2   | GCATACTCAGCAGGAAACTCT                            | Quantitative PCR <i>ycgZ</i>                                                                                                                               |
| YcgZ-RVS2   | TGTTCCAGTCGGCAAAGAA                              |                                                                                                                                                            |

---

**Table S2:** Quantification by RT-qPCR of *OmpF* transcript expressed in *E. coli* derivative mutants relative to that expressed in *E. coli* AG100 (wt) grown at 37°C (*lon*, M113R; *bluR*, AGEZ3, *lon bluR*, M113REZ3). <sup>(a)</sup> In each experiment, two repeats (replicates) were performed for each cDNA sample tested. Three experiments were performed using cDNA synthesized from different RNAs preparations. We used the average  $C_T$  to calculate the  $\Delta C_T$  for the target gene *ompF* and for the reference gene *gapA* for each experiment. <sup>(b)</sup> Equation  $R = \frac{(E_{ompF})^{\Delta C_T(\text{control-sample})}}{(E_{gapA})^{\Delta C_T(\text{control-sample})}}$  was used to measure the ratio of *ompF* transcript expressed in a sample versus that expressed in the AG100 grown at 37°C (control).  $E_{ompF}$  and  $E_{gapA}$  represent the amplification efficiencies obtained for *ompF* and *gapA* primers sets respectively (see Supplementary Figure S1). <sup>(c)</sup> The fold differences represent the means  $\pm$  SD of the R values obtained in the three experiments and are reported in Figure 2A.

| Samples                                                                         |                                 | $C_T$ values    |              |                 |              |                 |              | Fold difference <sup>(c)</sup>    |
|---------------------------------------------------------------------------------|---------------------------------|-----------------|--------------|-----------------|--------------|-----------------|--------------|-----------------------------------|
|                                                                                 |                                 | Experiment 1    |              | Experiment 2    |              | Experiment 3    |              |                                   |
| Replicate <sup>(a)</sup>                                                        |                                 | gapA            | ompF         | gapA            | ompF         | gapA            | ompF         |                                   |
| wt 37°C                                                                         | 1                               | 21.68           | 20.94        | 21.81           | 20.79        | 21.01           | 20.20        |                                   |
|                                                                                 | 2                               | 21.47           | 20.87        | 21.65           | 20.80        | 21.14           | 20.18        |                                   |
|                                                                                 | <b>Average <math>C_T</math></b> | <b>21.58</b>    | <b>20.91</b> | <b>21.73</b>    | <b>20.80</b> | <b>21.08</b>    | <b>20.19</b> |                                   |
| $C_{T(\text{wt } 37^\circ\text{C})} - C_{T(\text{wt } 37^\circ\text{C})}$       |                                 | <b>0</b>        | <b>0</b>     | <b>0</b>        | <b>0</b>     | <b>0</b>        | <b>0</b>     |                                   |
| $R^{(b)}$                                                                       |                                 | <b><i>I</i></b> |              | <b><i>I</i></b> |              | <b><i>I</i></b> |              | <b><i>I</i></b>                   |
| Replicate                                                                       |                                 | gapA            | ompF         | gapA            | ompF         | gapA            | ompF         |                                   |
| <i>lon</i> 37°C                                                                 | 1                               | 21.25           | 21.52        | 21.91           | 22.22        | 21.67           | 22.41        |                                   |
|                                                                                 | 2                               | 21.28           | 21.48        | 21.96           | 21.95        | 21.56           | 22.37        |                                   |
|                                                                                 | <b>Average <math>C_T</math></b> | <b>21.27</b>    | <b>21.50</b> | <b>21.94</b>    | <b>22.09</b> | <b>21.62</b>    | <b>22.39</b> |                                   |
| $C_{T(\text{wt } 37^\circ\text{C})} - C_{T(\text{lon } 37^\circ\text{C})}$      |                                 | <b>0.31</b>     | <b>-0.59</b> | <b>-0.21</b>    | <b>-1.29</b> | <b>-0.54</b>    | <b>-2.2</b>  |                                   |
| $R^{(b)}$                                                                       |                                 | <b>0.55</b>     |              | <b>0.49</b>     |              | <b>0.34</b>     |              | <b>0.46 <math>\pm</math> 0.11</b> |
| Replicate                                                                       |                                 | gapA            | ompF         | gapA            | ompF         | gapA            | ompF         |                                   |
| <i>bluR</i> 37°C                                                                | 1                               | 21.23           | 20.16        | 22.17           | 20.98        | 21.91           | 21.41        |                                   |
|                                                                                 | 2                               | 21.23           | 20.10        | 22.20           | 21.05        | 21.89           | 21.37        |                                   |
|                                                                                 | <b>Average <math>C_T</math></b> | <b>21.23</b>    | <b>20.13</b> | <b>22.19</b>    | <b>21.02</b> | <b>21.90</b>    | <b>21.39</b> |                                   |
| $C_{T(\text{wt } 37^\circ\text{C})} - C_{T(\text{bluR } 37^\circ\text{C})}$     |                                 | <b>0.35</b>     | <b>0.78</b>  | <b>-0.46</b>    | <b>-0.22</b> | <b>-0.82</b>    | <b>-1.2</b>  |                                   |
| $R^{(b)}$                                                                       |                                 | <b>1.33</b>     |              | <b>1.18</b>     |              | <b>0.78</b>     |              | <b>1.10 <math>\pm</math> 0.28</b> |
| Replicate                                                                       |                                 | gapA            | ompF         | gapA            | ompF         | gapA            | ompF         |                                   |
| <i>lon bluR</i> 37°C                                                            | 1                               | 21.50           | 20.21        | 21.50           | 21.12        | 21.49           | 20.52        |                                   |
|                                                                                 | 2                               | 21.32           | 20.21        | 21.46           | 20.99        | 21.45           | 20.52        |                                   |
|                                                                                 | <b>Average <math>C_T</math></b> | <b>21.41</b>    | <b>20.21</b> | <b>21.48</b>    | <b>21.06</b> | <b>21.47</b>    | <b>20.52</b> |                                   |
| $C_{T(\text{wt } 37^\circ\text{C})} - C_{T(\text{lon bluR } 37^\circ\text{C})}$ |                                 | <b>0.17</b>     | <b>0.70</b>  | <b>0.25</b>     | <b>-0.26</b> | <b>-0.39</b>    | <b>-0.33</b> |                                   |
| $R^{(b)}$                                                                       |                                 | <b>1.41</b>     |              | <b>0.71</b>     |              | <b>1.04</b>     |              | <b>1.05 <math>\pm</math> 0.35</b> |

**Table S3:** Quantification by RT-qPCR of *OmpF* transcript expressed in *E. coli* AG100 (wt) and derivative mutants grown at 25°C relative to that expressed in AG100 grown at 37°C (*lon*, M113R; *bluR*, AGEZ3, *lon bluR*, M113REZ3). <sup>(a)</sup> In each experiment, two repeats (replicates) were performed for each cDNA sample tested. Three experiments were performed using cDNA synthesized from three different RNAs preparations. We used the average  $C_T$  to calculate the  $\Delta C_T$  for the target gene *ompF* and for the reference gene *gapA* for each experiment. <sup>(b)</sup> Equation  $R = \frac{(E_{ompF})^{\Delta C_T(\text{control-sample})}}{(E_{gapA})^{\Delta C_T(\text{control-sample})}}$  was used to measure the ratio of *ompF* transcript expressed in a sample versus that expressed in the wt grown at 37°C (control).  $E_{ompF}$  and  $E_{gapA}$  are the amplification efficiencies obtained for *ompF* and *gapA* primers sets respectively (Supplementary Figure S1). <sup>(c)</sup> The fold differences represent the means  $\pm$  SD of the R values obtained in the three experiments and are reported in Figure 2A.

| Samples                                                                                      |                                 | $C_T$ values |              |              |              |              |              | Fold difference <sup>(c)</sup>    |
|----------------------------------------------------------------------------------------------|---------------------------------|--------------|--------------|--------------|--------------|--------------|--------------|-----------------------------------|
|                                                                                              |                                 | Experiment 1 |              | Experiment 2 |              | Experiment 3 |              |                                   |
| Replicate <sup>(a)</sup>                                                                     |                                 | gapA         | ompF         | gapA         | ompF         | gapA         | ompF         |                                   |
| wt 37°C                                                                                      | 1                               | 21.68        | 20.94        | 21.81        | 20.79        | 21.01        | 20.20        |                                   |
|                                                                                              | 2                               | 21.47        | 20.87        | 21.65        | 20.80        | 21.14        | 20.18        |                                   |
|                                                                                              | <b>Average <math>C_T</math></b> | <b>21.58</b> | <b>20.91</b> | <b>21.73</b> | <b>20.80</b> | <b>21.08</b> | <b>20.19</b> |                                   |
| $\Delta C_T = C_{T(\text{wt } 37^\circ\text{C})} - C_{T(\text{wt } 37^\circ\text{C})}$       |                                 | <b>0</b>     | <b>0</b>     | <b>0</b>     | <b>0</b>     | <b>0</b>     | <b>0</b>     |                                   |
| $R^{(b)}$                                                                                    |                                 | <b>1</b>     |              | <b>1</b>     |              | <b>1</b>     |              | <b>1</b>                          |
| Replicate                                                                                    |                                 | gapA         | ompF         | gapA         | ompF         | gapA         | ompF         |                                   |
| wt 25°C                                                                                      | 1                               | 21.02        | 17.68        | 21.15        | 17.83        | 20.86        | 17.18        |                                   |
|                                                                                              | 2                               | 21.02        | 17.70        | 21.22        | 17.87        | 20.90        | 17.24        |                                   |
|                                                                                              | <b>Average <math>C_T</math></b> | <b>21.02</b> | <b>17.69</b> | <b>21.19</b> | <b>17.85</b> | <b>20.88</b> | <b>17.21</b> |                                   |
| $\Delta C_T = C_{T(\text{wt } 37^\circ\text{C})} - C_{T(\text{wt } 25^\circ\text{C})}$       |                                 | <b>0.56</b>  | <b>3.23</b>  | <b>0.54</b>  | <b>2.95</b>  | <b>0.20</b>  | <b>2.98</b>  |                                   |
| $R^{(b)}$                                                                                    |                                 | <b>5.77</b>  |              | <b>4.87</b>  |              | <b>6.22</b>  |              | <b>5.62 <math>\pm</math> 0.69</b> |
| Replicate                                                                                    |                                 | gapA         | ompF         | gapA         | ompF         | gapA         | ompF         |                                   |
| <i>lon</i> 25°C                                                                              | 1                               | 20.72        | 18.50        | 21.90        | 19.63        | 20.67        | 17.78        |                                   |
|                                                                                              | 2                               | 20.72        | 18.48        | 21.94        | 19.73        | 20.60        | 17.75        |                                   |
|                                                                                              | <b>Average <math>C_T</math></b> | <b>20.72</b> | <b>18.49</b> | <b>21.92</b> | <b>19.68</b> | <b>20.64</b> | <b>17.77</b> |                                   |
| $\Delta C_T = C_{T(\text{wt } 37^\circ\text{C})} - C_{T(\text{lon } 25^\circ\text{C})}$      |                                 | <b>0.86</b>  | <b>2.42</b>  | <b>-0.19</b> | <b>1.12</b>  | <b>0.44</b>  | <b>2.42</b>  |                                   |
| $R^{(b)}$                                                                                    |                                 | <b>2.76</b>  |              | <b>2.38</b>  |              | <b>3.66</b>  |              | <b>2.93 <math>\pm</math> 0.66</b> |
| Replicate                                                                                    |                                 | gapA         | ompF         | gapA         | ompF         | gapA         | ompF         |                                   |
| <i>bluR</i> 25°C                                                                             | 1                               | 21.53        | 18.03        | 21.28        | 17.20        | 21.71        | 18.05        |                                   |
|                                                                                              | 2                               | 21.58        | 18.05        | 21.31        | 17.33        | 21.59        | 18.02        |                                   |
|                                                                                              | <b>Average <math>C_T</math></b> | <b>21.56</b> | <b>18.04</b> | <b>21.29</b> | <b>17.27</b> | <b>21.65</b> | <b>18.04</b> |                                   |
| $\Delta C_T = C_{T(\text{wt } 37^\circ\text{C})} - C_{T(\text{bluR } 25^\circ\text{C})}$     |                                 | <b>0.02</b>  | <b>2.87</b>  | <b>0.44</b>  | <b>3.53</b>  | <b>-0.57</b> | <b>2.15</b>  |                                   |
| $R^{(b)}$                                                                                    |                                 | <b>6.53</b>  |              | <b>7.60</b>  |              | <b>6.04</b>  |              | <b>6.74 <math>\pm</math> 0.83</b> |
| Replicate                                                                                    |                                 | gapA         | ompF         | gapA         | ompF         | gapA         | ompF         |                                   |
| <i>lon bluR</i> 25°C                                                                         | 1                               | 21.30        | 20.84        | 21.15        | 20.89        | 21.00        | 20.77        |                                   |
|                                                                                              | 2                               | 21.30        | 20.87        | 21.09        | 20.92        | 21.01        | 20.90        |                                   |
|                                                                                              | <b>Average <math>C_T</math></b> | <b>21.30</b> | <b>20.86</b> | <b>21.12</b> | <b>20.91</b> | <b>21.01</b> | <b>20.84</b> |                                   |
| $\Delta C_T = C_{T(\text{wt } 37^\circ\text{C})} - C_{T(\text{lon bluR } 25^\circ\text{C})}$ |                                 | <b>0.28</b>  | <b>0.05</b>  | <b>0.61</b>  | <b>-0.11</b> | <b>0.07</b>  | <b>-0.65</b> |                                   |
| $R^{(b)}$                                                                                    |                                 | <b>0.86</b>  |              | <b>0.62</b>  |              | <b>0.62</b>  |              | <b>0.70 <math>\pm</math> 0.14</b> |

**Table S4:** Quantification by RT-qPCR of *ycgZ* transcript expressed in *E. coli* derivative mutants relative to that expressed in *E. coli* AG100 (wt) grown at 37°C (*lon*, M113R; *lon bluR*, M113REZ3). <sup>(a)</sup> In each experiment, two repeats (replicates) were performed for each cDNA sample tested. Three experiments were performed using cDNA synthesized from three different RNAs preparations. We used the average  $C_T$  to calculate the  $\Delta C_T$  for the target gene *ycgZ* and for the reference gene *gapA* for each experiments. <sup>(b)</sup> Equation  $R = \frac{(E_{ycgZ})^{\Delta C_T(\text{control-sample})}}{(E_{gapA})^{\Delta C_T(\text{control-sample})}}$  was used to measure the ratio of *ycgZ* transcript expressed in a sample versus that expressed in the wild type grown at 37°C (control).  $E_{ycgZ}$  and  $E_{gapA}$  represent the amplification efficiencies obtained for *ycgZ* and *gapA* primers sets respectively (Supplementary Figure S1). <sup>(c)</sup> The fold differences represent the means  $\pm$  SD of the R values obtained in the three experiments and are reported in Figure 4A.

| Samples                                                                                      |                                 | $C_T$ values |              |              |              |              |              | Fold difference <sup>(c)</sup>     |
|----------------------------------------------------------------------------------------------|---------------------------------|--------------|--------------|--------------|--------------|--------------|--------------|------------------------------------|
|                                                                                              |                                 | Experiment 1 |              | Experiment 2 |              | Experiment 3 |              |                                    |
| Replicate <sup>(a)</sup>                                                                     |                                 | gapA         | ycgZ         | gapA         | ycgZ         | gapA         | ycgZ         |                                    |
| wt 37°C                                                                                      | 1                               | 21.68        | 30.23        | 21.81        | 31.09        | 21.01        | 29.85        |                                    |
|                                                                                              | 2                               | 21.47        | 30.91        | 21.65        | 30.69        | 21.14        | 29.71        |                                    |
|                                                                                              | <b>Average <math>C_T</math></b> | <b>21.58</b> | <b>30.57</b> | <b>21.73</b> | <b>30.89</b> | <b>21.08</b> | <b>29.78</b> |                                    |
| $\Delta C_T = C_{T(\text{wt } 37^\circ\text{C})} - C_{T(\text{wt } 37^\circ\text{C})}$       |                                 | <b>0</b>     |              | <b>0</b>     |              | <b>0</b>     |              |                                    |
| $R^{(b)}$                                                                                    |                                 | <b>1</b>     |              | <b>1</b>     |              | <b>1</b>     |              | <b>1</b>                           |
| Replicate                                                                                    |                                 | gapA         | ycgZ         | gapA         | ycgZ         | gapA         | ycgZ         |                                    |
| <i>bluR</i> 37°C                                                                             | 1                               | 21.23        | 23.06        | 22.17        | 25.26        | 21.90        | 23.26        |                                    |
|                                                                                              | 2                               | 21.23        | 23.06        | 22.20        | 25.85        | 21.89        | 23.31        |                                    |
|                                                                                              | <b>Average <math>C_T</math></b> | <b>21.23</b> | <b>23.06</b> | <b>22.19</b> | <b>25.79</b> | <b>21.90</b> | <b>23.29</b> |                                    |
| $\Delta C_T = C_{T(\text{wt } 37^\circ\text{C})} - C_{T(\text{bluR } 37^\circ\text{C})}$     |                                 | <b>0.35</b>  |              | <b>-0.46</b> |              | <b>-0.82</b> |              |                                    |
| $R^{(b)}$                                                                                    |                                 | <b>98.1</b>  |              | <b>129.6</b> |              | <b>111.4</b> |              | <b>113.0 <math>\pm</math> 15.8</b> |
| Replicate                                                                                    |                                 | gapA         | ycgZ         | gapA         | ycgZ         | gapA         | ycgZ         |                                    |
| <i>lon bluR</i> 37°C                                                                         | 1                               | 21.50        | 22.53        | 21.50        | 23.20        | 21.49        | 23.18        |                                    |
|                                                                                              | 2                               | 21.32        | 22.57        | 21.46        | 23.06        | 21.45        | 23.00        |                                    |
|                                                                                              | <b>Average <math>C_T</math></b> | <b>21.41</b> | <b>22.55</b> | <b>21.48</b> | <b>23.13</b> | <b>21.47</b> | <b>23.09</b> |                                    |
| $\Delta C_T = C_{T(\text{wt } 37^\circ\text{C})} - C_{T(\text{lon bluR } 37^\circ\text{C})}$ |                                 | <b>0.17</b>  |              | <b>0.25</b>  |              | <b>-0.39</b> |              |                                    |
| $R^{(b)}$                                                                                    |                                 | <b>153.6</b> |              | <b>123.2</b> |              | <b>95.0</b>  |              | <b>124.0 <math>\pm</math> 29.4</b> |

**Table S5:** Quantification by RT-qPCR of *ycgZ* transcript expressed in *E. coli* AG100 and derivative mutants grown at 25°C relative to that expressed in AG100 grown at 37°C (*lon*, M113R; *lon bluR*, M113REZ3). <sup>(a)</sup> In each experiment, two repeats (replicates) were performed for each cDNA sample tested. Three experiments were performed using cDNA synthesized from different RNAs preparations. We used the average  $C_T$  to calculate the  $\Delta C_T$  for the target gene *ycgZ* and for the reference gene *gapA* for each experiment. <sup>(b)</sup> Equation  $R = \frac{(E_{ycgZ})^{\Delta C_T(\text{control-sample})}}{(E_{gapA})^{\Delta C_T(\text{control-sample})}}$  was used to measure the ratio of *ycgZ* transcript expressed in a sample versus that expressed in the wild type strain grown at 37°C (control).  $E_{ycgZ}$  and  $E_{gapA}$  represent the amplification efficiencies obtained for *ycgZ* and *gapA* primers sets respectively (Figure S1). <sup>(c)</sup> The fold differences represent the means  $\pm$  SD of the R values obtained in the three experiments and are reported in Figure 4A.

| Samples                  |                                                                                              | $C_T$ values |              |              |              |              |                                    | Fold difference <sup>(c)</sup> |
|--------------------------|----------------------------------------------------------------------------------------------|--------------|--------------|--------------|--------------|--------------|------------------------------------|--------------------------------|
| Replicate <sup>(a)</sup> |                                                                                              | Experiment 1 |              | Experiment 2 |              | Experiment 3 |                                    |                                |
|                          |                                                                                              | gapA         | ycgZ         | gapA         | ycgZ         | gapA         | ycgZ                               |                                |
| wt 37°C                  | 1                                                                                            | 21.68        | 30.23        | 21.81        | 31.09        | 21.01        | 29.85                              |                                |
|                          | 2                                                                                            | 21.47        | 30.91        | 21.65        | 30.69        | 21.14        | 29.71                              |                                |
|                          | <b>Average <math>C_T</math></b>                                                              | <b>21.58</b> | <b>30.57</b> | <b>21.73</b> | <b>30.89</b> | <b>21.08</b> | <b>29.78</b>                       |                                |
|                          | $\Delta C_T = C_{T(\text{wt } 37^\circ\text{C})} - C_{T(\text{wt } 37^\circ\text{C})}$       | <b>0</b>     | <b>0</b>     | <b>0</b>     | <b>0</b>     | <b>0</b>     | <b>0</b>                           |                                |
| $R^{(b)}$                | <i>I</i>                                                                                     |              | <i>I</i>     |              | <i>I</i>     |              | <i>I</i>                           |                                |
| wt 25°C                  | 1                                                                                            | 21.02        | 24.37        | 21.15        | 23.81        | 20.86        | 23.97                              |                                |
|                          | 2                                                                                            | 21.02        | 24.31        | 21.22        | 23.87        | 20.90        | 24.03                              |                                |
|                          | <b>Average <math>C_T</math></b>                                                              | <b>21.02</b> | <b>24.34</b> | <b>21.19</b> | <b>23.84</b> | <b>20.88</b> | <b>24.00</b>                       |                                |
|                          | $\Delta C_T = C_{T(\text{wt } 37^\circ\text{C})} - C_{T(\text{wt } 25^\circ\text{C})}$       | <b>0.56</b>  | <b>6.23</b>  | <b>0.54</b>  | <b>7.05</b>  | <b>0.20</b>  | <b>5.78</b>                        |                                |
| $R^{(b)}$                | <b>37.6</b>                                                                                  |              | <b>64.6</b>  |              | <b>35.8</b>  |              | <b>46.0 <math>\pm</math> 16.1</b>  |                                |
| <i>bluR</i> 25°C         | 1                                                                                            | 21.53        | 22.72        | 21.28        | 21.73        | 21.71        | 22.30                              |                                |
|                          | 2                                                                                            | 21.58        | 22.71        | 21.31        | 21.84        | 21.59        | 22.48                              |                                |
|                          | <b>Average <math>C_T</math></b>                                                              | <b>21.56</b> | <b>22.72</b> | <b>21.29</b> | <b>21.79</b> | <b>21.65</b> | <b>22.39</b>                       |                                |
|                          | $\Delta C_T = C_{T(\text{wt } 37^\circ\text{C})} - C_{T(\text{bluR } 25^\circ\text{C})}$     | <b>0.02</b>  | <b>7.85</b>  | <b>0.44</b>  | <b>9.10</b>  | <b>-0.57</b> | <b>7.39</b>                        |                                |
| $R^{(b)}$                | <b>152.5</b>                                                                                 |              | <b>256.7</b> |              | <b>168.8</b> |              | <b>192.7 <math>\pm</math> 56.1</b> |                                |
| <i>lon bluR</i> 25°C     | 1                                                                                            | 21.30        | 21.59        | 21.15        | 21.52        | 21.00        | 21.34                              |                                |
|                          | 2                                                                                            | 21.30        | 21.60        | 21.09        | 21.66        | 21.01        | 21.27                              |                                |
|                          | <b>Average <math>C_T</math></b>                                                              | <b>21.30</b> | <b>21.60</b> | <b>21.12</b> | <b>21.59</b> | <b>21.01</b> | <b>21.31</b>                       |                                |
|                          | $\Delta C_T = C_{T(\text{wt } 37^\circ\text{C})} - C_{T(\text{lon bluR } 25^\circ\text{C})}$ | <b>0.28</b>  | <b>8.97</b>  | <b>0.61</b>  | <b>9.30</b>  | <b>0.07</b>  | <b>8.47</b>                        |                                |
| $R^{(b)}$                | <b>262.5</b>                                                                                 |              | <b>260.3</b> |              | <b>219.1</b> |              | <b>248.0 <math>\pm</math> 25.1</b> |                                |

**Table S6:** Quantification by RT-qPCR of OmpF transcript expressed in *E. coli* derivative mutants relative to that expressed in *E. coli* BW25113 (wt) grown at 37°C (*lon*, JW0419-1; *lon bluR*, VD102; *lon bluR ZABC*, VD104). <sup>(a)</sup> In each experiment, two repeats (replicates) were performed for each cDNA sample tested. Three experiments were performed using cDNA synthesized from different RNAs preparations. We used the average  $C_T$  to calculate the  $\Delta C_T$  for the target gene *ompF* and for the reference gene *gapA* for each experiment. <sup>(b)</sup> Equation  $R = \frac{(E_{ompF})^{\Delta C_T(\text{control-sample})}}{(E_{gapA})^{\Delta C_T(\text{control-sample})}}$  was used to measure the ratio of *ompF* transcript expressed in a sample versus that expressed in the BW25113 grown at 37°C (control).  $E_{ompF}$  and  $E_{gapA}$  represent the amplification efficiencies obtained for *ompF* and *gapA* primers sets respectively (Figure S1). <sup>(c)</sup> The fold differences represent the means  $\pm$  SD of the R values obtained in the three experiments and are reported in Figure 5A.

| Samples                                                                                           |                                 | $C_T$ values |              |              |              |              |              | Fold difference <sup>(c)</sup>    |
|---------------------------------------------------------------------------------------------------|---------------------------------|--------------|--------------|--------------|--------------|--------------|--------------|-----------------------------------|
|                                                                                                   |                                 | Experiment 1 |              | Experiment 2 |              | Experiment 3 |              |                                   |
| Replicate <sup>(a)</sup>                                                                          |                                 | gapA         | ompF         | gapA         | ompF         | gapA         | ompF         |                                   |
| wt 37°C                                                                                           | 1                               | 20.48        | 19.55        | 20.09        | 19.23        | 20.31        | 20.52        |                                   |
|                                                                                                   | 2                               | 20.31        | 19.53        | 20.08        | 19.28        | 20.93        | 20.05        |                                   |
|                                                                                                   | <b>Average <math>C_T</math></b> | <b>20.40</b> | <b>19.54</b> | <b>20.09</b> | <b>19.26</b> | <b>20.62</b> | <b>20.29</b> |                                   |
| $\Delta C_T = C_{T(\text{wt } 37^\circ\text{C})} - C_{T(\text{wt } 37^\circ\text{C})}$            |                                 | <b>0</b>     | <b>0</b>     | <b>0</b>     | <b>0</b>     | <b>0</b>     | <b>0</b>     |                                   |
| $R^{(b)}$                                                                                         |                                 | <b>1</b>     |              | <b>1</b>     |              | <b>1</b>     |              | <b>1</b>                          |
| Replicate                                                                                         |                                 | gapA         | ompF         | gapA         | ompF         | gapA         | ompF         |                                   |
| <i>lon bluR</i> 37°C                                                                              | 1                               | 20.30        | 20.11        | 20.79        | 20.14        | 21.13        | 20.34        |                                   |
|                                                                                                   | 2                               | 20.21        | 20.11        | 20.79        | 20.18        | 21.10        | 20.45        |                                   |
|                                                                                                   | <b>Average <math>C_T</math></b> | <b>20.26</b> | <b>20.11</b> | <b>20.79</b> | <b>20.16</b> | <b>21.12</b> | <b>20.40</b> |                                   |
| $\Delta C_T = C_{T(\text{wt } 37^\circ\text{C})} - C_{T(\text{lon bluR } 37^\circ\text{C})}$      |                                 | <b>0.14</b>  | <b>-0.57</b> | <b>-0.70</b> | <b>-0.90</b> | <b>-0.50</b> | <b>-0.11</b> |                                   |
| $R^{(b)}$                                                                                         |                                 | <b>0.63</b>  |              | <b>0.87</b>  |              | <b>1.29</b>  |              | <b>0.93 <math>\pm</math> 0.33</b> |
| Replicate                                                                                         |                                 | gapA         | ompF         | gapA         | ompF         | gapA         | ompF         |                                   |
| <i>lon bluR ZABC</i> 37°C                                                                         | 1                               | 19.93        | 20.03        | 20.54        | 20.81        | 19.63        | 20.83        |                                   |
|                                                                                                   | 2                               | 19.93        | 20.03        | 20.50        | 20.73        | 19.61        | 21.18        |                                   |
|                                                                                                   | <b>Average <math>C_T</math></b> | <b>19.93</b> | <b>20.03</b> | <b>20.52</b> | <b>20.77</b> | <b>19.62</b> | <b>21.01</b> |                                   |
| $\Delta C_T = C_{T(\text{wt } 37^\circ\text{C})} - C_{T(\text{lon bluR ZABC } 37^\circ\text{C})}$ |                                 | <b>0.47</b>  | <b>-0.49</b> | <b>-0.43</b> | <b>-1.51</b> | <b>1.00</b>  | <b>-0.72</b> |                                   |
| $R^{(b)}$                                                                                         |                                 | <b>0.53</b>  |              | <b>0.49</b>  |              | <b>0.32</b>  |              | <b>0.45 <math>\pm</math> 0.11</b> |



**Table S7:** Quantification by RT-qPCR of OmpF transcript expressed in *E. coli* BW25113 (wt) and derivative mutants grown at 25°C relative to that expressed in BW25113 grown at 37°C (*lon*, JW0419-1; *lon bluR*, VD102; *lon bluR ZABC*, VD104). <sup>(a)</sup> In each experiment, two repeats (replicates) were performed for each cDNA sample tested. Three experiments were performed using cDNA synthesized from different RNAs preparations. We used the average C<sub>T</sub> to calculate the ΔC<sub>T</sub> for the target gene *ompF* and for the reference gene *gapA* in each experiment. <sup>(b)</sup> Equation  $R = \frac{(E_{ompF})^{\Delta C_T(\text{control-sample})}}{(E_{gapA})^{\Delta C_T(\text{control-sample})}}$  was used to measure the ratio of *ompF* transcript expressed in a sample versus that expressed in the BW25113 grown at 37°C (control). E<sub>ompF</sub> and E<sub>gapA</sub> represent the amplification efficiencies obtained for *ompF* and *gapA* primers sets respectively (Figure S1). <sup>(c)</sup> The fold differences represent the means ± SD of the R values obtained in the three experiments and are reported in Figure 5A.

| Samples                                                                                                             |                              | C <sub>T</sub> values |              |              |              |              |              | Fold difference <sup>(c)</sup> |
|---------------------------------------------------------------------------------------------------------------------|------------------------------|-----------------------|--------------|--------------|--------------|--------------|--------------|--------------------------------|
|                                                                                                                     |                              | Experiment 1          |              | Experiment 2 |              | Experiment 3 |              |                                |
| Replicate <sup>(a)</sup>                                                                                            |                              | gapA                  | ompF         | gapA         | ompF         | gapA         | ompF         |                                |
| wt 37°C                                                                                                             | 1                            | 20.48                 | 19.55        | 20.09        | 19.23        | 20.31        | 20.52        |                                |
|                                                                                                                     | 2                            | 20.31                 | 19.53        | 20.08        | 19.28        | 20.93        | 20.05        |                                |
|                                                                                                                     | <b>Average C<sub>T</sub></b> | <b>20.40</b>          | <b>19.54</b> | <b>20.09</b> | <b>19.26</b> | <b>20.62</b> | <b>20.29</b> |                                |
| $\Delta C_T = C_{T(\text{wt } 37^\circ\text{C})} - C_{T(\text{wt } 37^\circ\text{C})}$                              |                              | <b>0</b>              | <b>0</b>     | <b>0</b>     | <b>0</b>     | <b>0</b>     | <b>0</b>     |                                |
| $R^{(b)}$                                                                                                           |                              | <b>1</b>              |              | <b>1</b>     |              | <b>1</b>     |              | <b>1</b>                       |
| Replicate                                                                                                           |                              | gapA                  | ompF         | gapA         | ompF         | gapA         | ompF         |                                |
| wt 25°C                                                                                                             | 1                            | 20.32                 | 17.60        | 20.08        | 17.55        | 20.32        | 17.10        |                                |
|                                                                                                                     | 2                            | 20.27                 | 17.45        | 20.14        | 17.39        | 20.45        | 17.80        |                                |
|                                                                                                                     | <b>Average C<sub>T</sub></b> | <b>20.30</b>          | <b>17.53</b> | <b>20.11</b> | <b>17.47</b> | <b>20.39</b> | <b>17.45</b> |                                |
| $\Delta C_T = C_{T(\text{wt } 37^\circ\text{C})} - C_{T(\text{wt } 25^\circ\text{C})}$                              |                              | <b>0.10</b>           | <b>2.01</b>  | <b>-0.02</b> | <b>1.79</b>  | <b>0.23</b>  | <b>2.84</b>  |                                |
| $R^{(b)}$                                                                                                           |                              | <b>3.50</b>           |              | <b>3.29</b>  |              | <b>5.55</b>  |              | <b>4.11 ± 1.26</b>             |
| Replicate                                                                                                           |                              | gapA                  | ompF         | gapA         | ompF         | gapA         | ompF         |                                |
| <i>lon bluR</i> 25°C                                                                                                | 1                            | 19.69                 | 19.05        | 20.20        | 19.06        | 20.33        | 19.16        |                                |
|                                                                                                                     | 2                            | 19.60                 | 19.06        | 20.24        | 19.14        | 20.49        | 19.20        |                                |
|                                                                                                                     | <b>Average C<sub>T</sub></b> | <b>19.65</b>          | <b>19.06</b> | <b>20.22</b> | <b>19.10</b> | <b>20.41</b> | <b>19.18</b> |                                |
| $\Delta C_T = C_{T(\text{wt } 37^\circ\text{C})} - C_{T(\text{lon } bluR \text{ } 25^\circ\text{C})}$               |                              | <b>0.75</b>           | <b>0.48</b>  | <b>-0.13</b> | <b>0.16</b>  | <b>0.21</b>  | <b>1.11</b>  |                                |
| $R^{(b)}$                                                                                                           |                              | <b>0.83</b>           |              | <b>1.20</b>  |              | <b>1.80</b>  |              | <b>1.28 ± 0.49</b>             |
| Replicate                                                                                                           |                              | gapA                  | ompF         | gapA         | ompF         | gapA         | ompF         |                                |
| <i>lon bluR ZABC</i> 25°C                                                                                           | 1                            | 20.14                 | 17.30        | 20.17        | 17.15        | 20.74        | 17.80        |                                |
|                                                                                                                     | 2                            | 20.19                 | 17.46        | 20.27        | 17.19        | 20.78        | 17.72        |                                |
|                                                                                                                     | <b>Average C<sub>T</sub></b> | <b>20.17</b>          | <b>17.38</b> | <b>20.22</b> | <b>17.17</b> | <b>20.76</b> | <b>17.76</b> |                                |
| $\Delta C_T = C_{T(\text{wt } 37^\circ\text{C})} - C_{T(\text{lon } bluR \text{ } ZABC \text{ } 25^\circ\text{C})}$ |                              | <b>0.23</b>           | <b>2.16</b>  | <b>-0.13</b> | <b>2.09</b>  | <b>-0.14</b> | <b>2.53</b>  |                                |
| $R^{(b)}$                                                                                                           |                              | <b>3.54</b>           |              | <b>4.30</b>  |              | <b>5.80</b>  |              | <b>4.55 ± 1.15</b>             |

**Table S8:** Quantification by RT-qPCR of *ycgZ* transcript expressed in *E. coli* BW25113 (wt) and JW0419-1 (lon) when expressed using pDVBZ vector and 0.05% of L-arabinose (wt/Z and lon/Z).  
<sup>(a)</sup> Two repeats (replicates) were performed for each cDNA sample tested. One experiment was performed with RNAs prepared from the same *E. coli* cultures used to prepare the protein samples shown in Figure 6A. We used the average  $C_T$  to calculate the  $\Delta C_T$  for the target gene *ycgZ* and for the reference gene *gapA*. <sup>(b)</sup> Equation  $R = \frac{(E_{ycgZ})^{\Delta C_T(\text{control-sample})}}{(E_{gapA})^{\Delta C_T(\text{control-sample})}}$  was used to measure the ratio of *ycgZ* transcript expressed in a sample versus that expressed in the wild type carrying the empty plasmid pBAD/HisA grown at 37°C in the presence of 0.05% of L-arabinose (control).  $E_{ycgZ}$  and  $E_{gapA}$  represent the amplification efficiencies obtained for *ycgZ* and *gapA* primers sets respectively (Figure S1).

| Samples                                                                                           |                          | $C_T$ values |              |
|---------------------------------------------------------------------------------------------------|--------------------------|--------------|--------------|
|                                                                                                   |                          | Experiment 1 |              |
|                                                                                                   | Replicate <sup>(a)</sup> | gapA         | ycgZ         |
| wt/pBAD-HisA 37°C                                                                                 | 1                        | 21.10        | 28.77        |
|                                                                                                   | 2                        | 20.97        | 28.99        |
| Average $C_T$                                                                                     |                          | <b>21.04</b> | <b>28.88</b> |
| $\Delta C_T = C_{T(\text{wt/pBAD } 37^\circ\text{C})} - C_{T(\text{wt/pBAD } 37^\circ\text{C})}$  |                          | <b>0</b>     | <b>0</b>     |
| $R^{(b)}$                                                                                         |                          | <b>1</b>     |              |
|                                                                                                   | Replicate                | gapA         | ycgZ         |
| wt/pDVBZ 37°C                                                                                     | 1                        | 21.54        | 13.85        |
|                                                                                                   | 2                        | 21.83        | 13.96        |
| Average $C_T$                                                                                     |                          | <b>21.69</b> | <b>13.91</b> |
| $\Delta C_T = C_{T(\text{wt/pBAD } 37^\circ\text{C})} - C_{T(\text{wt/Z } 37^\circ\text{C})}$     |                          | <b>-0.65</b> | <b>14.97</b> |
| $R^{(b)}$                                                                                         |                          | <b>22986</b> |              |
|                                                                                                   | Replicate                | gapA         | ycgZ         |
| wt/pDVBZ 25°C                                                                                     | 1                        | 20.11        | 15.18        |
|                                                                                                   | 2                        | 20.82        | 15.28        |
| Average $C_T$                                                                                     |                          | <b>20.47</b> | <b>15.23</b> |
| $\Delta C_T = C_{T(\text{wt/pBAD } 37^\circ\text{C})} - C_{T(\text{wt/Z } 25^\circ\text{C})}$     |                          | <b>0.57</b>  | <b>13.65</b> |
| $R^{(b)}$                                                                                         |                          | <b>4362</b>  |              |
|                                                                                                   | Replicate                | gapA         | ycgZ         |
| lon/pBAD-HisA 37C                                                                                 | 1                        | 21.44        | 28.13        |
|                                                                                                   | 2                        | 21.16        | 28.25        |
| Average $C_T$                                                                                     |                          | <b>21.30</b> | <b>28.19</b> |
| $\Delta C_T = C_{T(\text{wt/pBAD } 37^\circ\text{C})} - C_{T(\text{lon/pBAD } 37^\circ\text{C})}$ |                          | <b>-0.26</b> | <b>0.69</b>  |
| $R^{(b)}$                                                                                         |                          | <b>1.85</b>  |              |
|                                                                                                   | Replicate                | gapA         | ycgZ         |
| lon/pDVBZ 37°C                                                                                    | 1                        | 21.20        | 13.32        |
|                                                                                                   | 2                        | 21.56        | 13.63        |
| Average $C_T$                                                                                     |                          | <b>21.39</b> | <b>13.48</b> |
| $\Delta C_T = C_{T(\text{wt/pBAD } 37^\circ\text{C})} - C_{T(\text{lon/Z } 37^\circ\text{C})}$    |                          | <b>-0.35</b> | <b>15.40</b> |
| $R^{(b)}$                                                                                         |                          | <b>24792</b> |              |
|                                                                                                   | Replicate                | gapA         | ycgZ         |
| lon/pDVBZ 25°C                                                                                    | 1                        | 21.28        | 15.30        |
|                                                                                                   | 2                        | 21.12        | 15.42        |
| Average $C_T$                                                                                     |                          | <b>21.20</b> | <b>15.36</b> |
| $\Delta C_T = C_{T(\text{wt/pBAD } 37^\circ\text{C})} - C_{T(\text{lon/Z } 25^\circ\text{C})}$    |                          | <b>-0.16</b> | <b>13.52</b> |
| $R^{(b)}$                                                                                         |                          | <b>6534</b>  |              |

## 2. Supplementary Figures.

A.

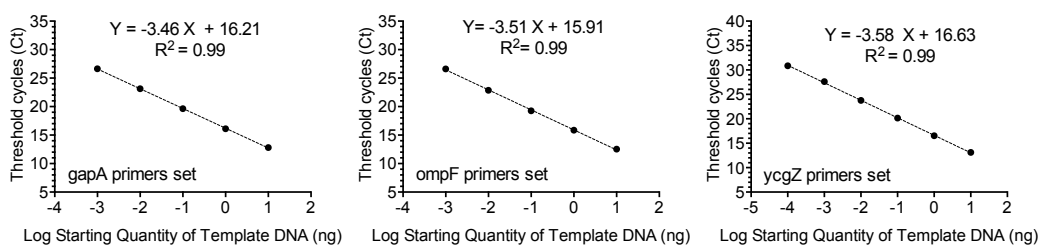

B.

| Primers set | Slope            | Efficiency (E) | % Efficiency |
|-------------|------------------|----------------|--------------|
| gapA        | $-3.46 \pm 0.02$ | 1.95           | 95%          |
| ompF        | $-3.51 \pm 0.05$ | 1.93           | 93%          |
| ycgZ        | $-3.58 \pm 0.04$ | 1.90           | 90%          |

C.

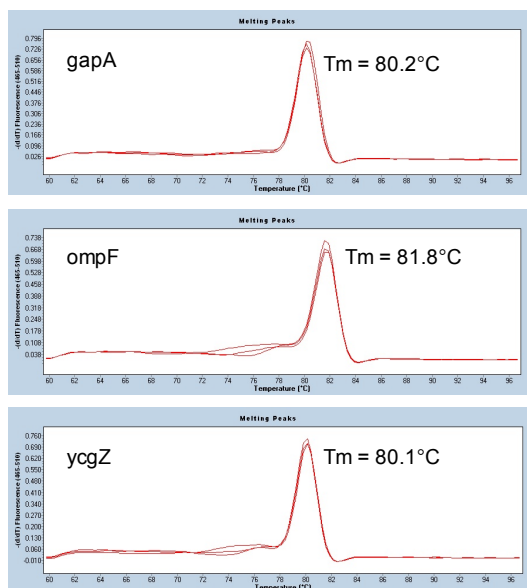

**Figure S1.** Amplification efficiency and melting curve analysis of each set of primers used for the qPCR experiments. (A) Determination of the amplification efficiencies. The curves were constructed by plotting the log of the starting quantity of *E. coli* AG100 genomic DNA against the C<sub>T</sub> value obtained during PCR amplification. The equation for the linear regression as well as the coefficient of determination (R<sup>2</sup>) were calculated using GraphPad Prims 6 ([www.graphpad.com](http://www.graphpad.com)) and are shown above each graph (n=3). (B) Amplification efficiency (E = 10<sup>-1/slope</sup>) and percentage of efficiency (%E = (E-1) x 100%) measured for each set of primers. (C) Melting curves analysis recovered after qPCR runs using the lowest input of cDNA template. The negative first derivative of the change in fluorescence is plotted as a function of temperature. The numbers indicate the melting temperature of single specific products.

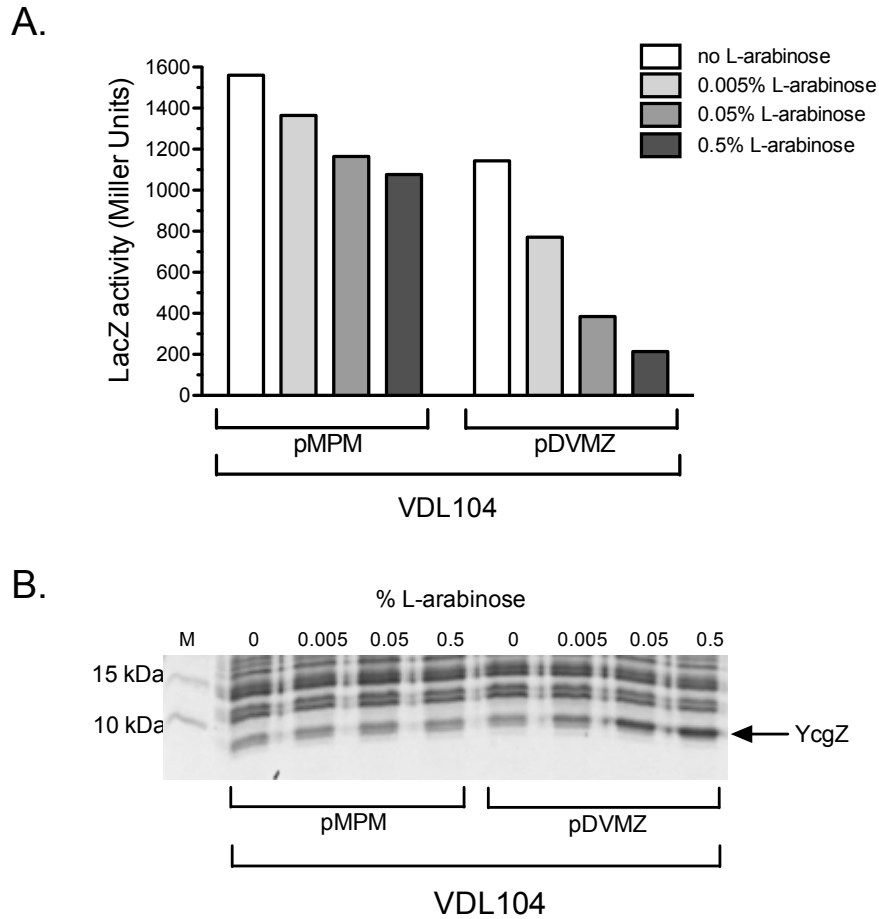

**Figure S2.** Repression of *OmpF* promoter by *YcgZ*. (A) L-arabinose-dependent activity of *PompF-lacZ* in VDL104 (*lon bluR ycgZ-yngABC*) when *YcgZ* is expressed using pDVMZ plasmid. (B) SDS-PAGE using a 16% acrylamide gel showing a L-arabinose-dependent increased in *YcgZ* protein in strain VDL104/pDVMZ. M, Benchmark Protein Ladder.
